# Supplementary material for: 5-aminoimidazole-4-carboxamide ribonucleoside induces differentiation in a subset of primary acute myeloid leukemia blasts
Source: PubMed Central journal article supplement (PMC7657321; doi:10.1186/s12885-020-07533-6), 2020-11-11

# Supplementary Figure 1

a)

TCGA Dataset, N = 162

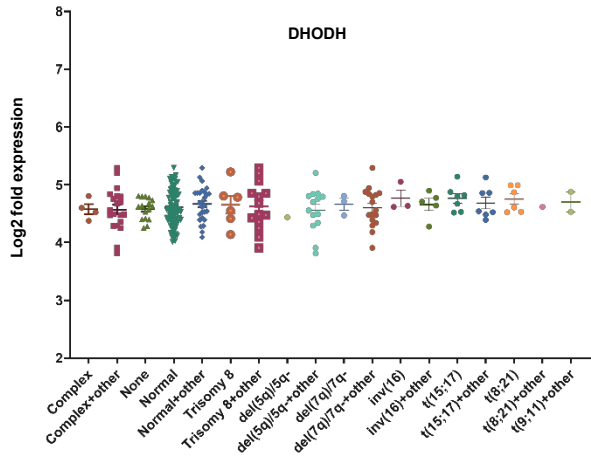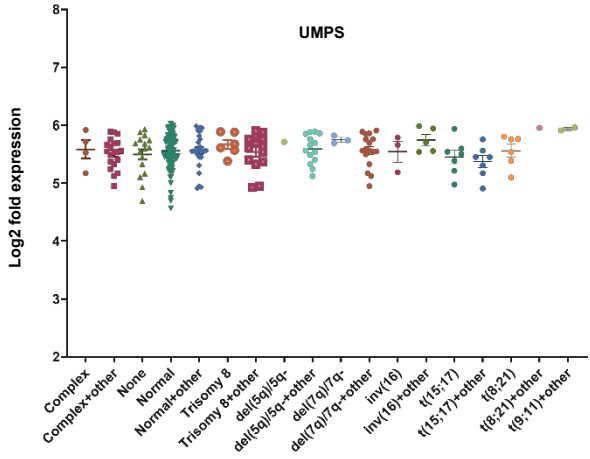

GSE15434 Dataset, Normal karyotype AML, N = 251

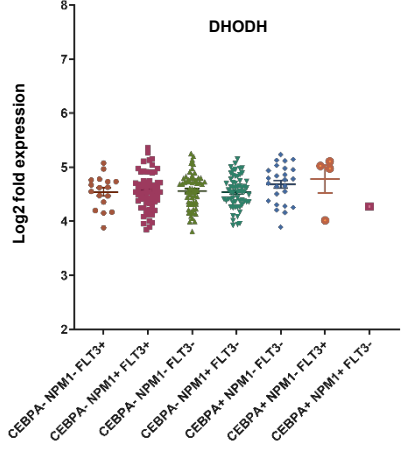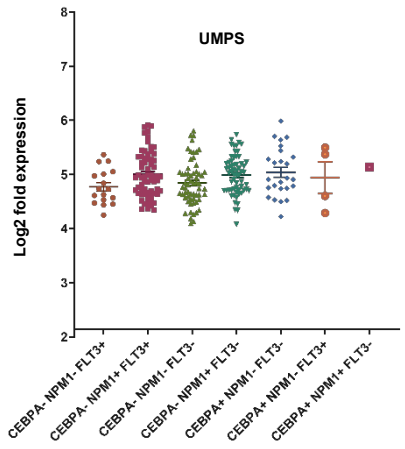

b)

TCGA Dataset, N = 162

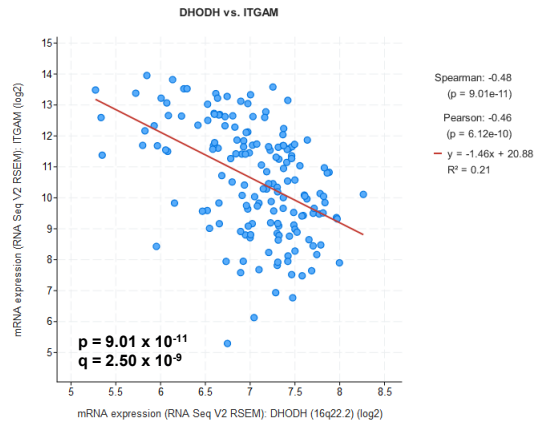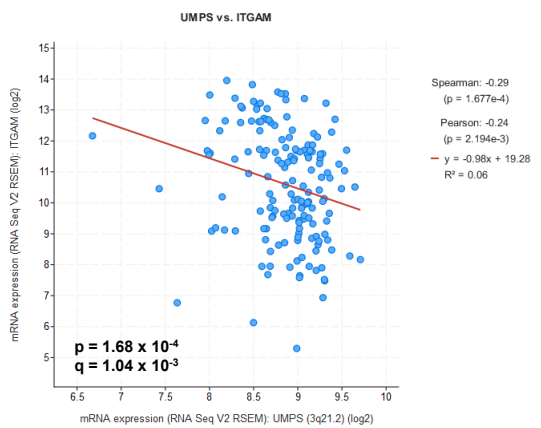

OHSU Dataset, N = 405

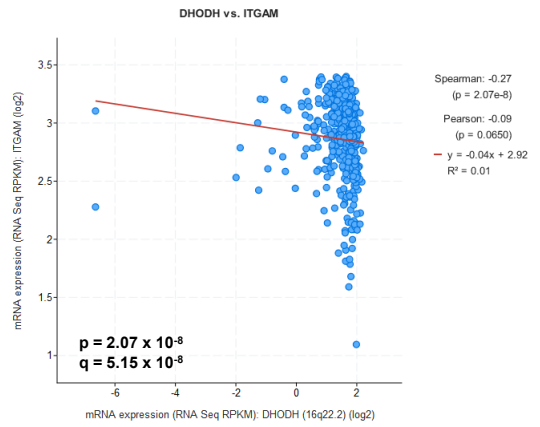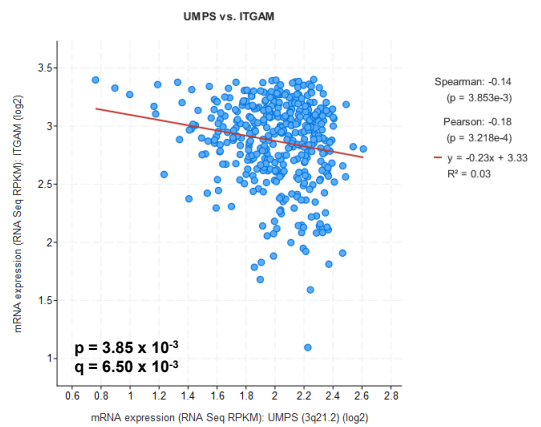

Supplement: 12885_2020_7533_MOESM5_ESM.pdf [file 12885_2020_7533_MOESM5_ESM.pdf]
